# Supplementary material for: Prevalence of Renal Neoplasia in Autosomal Dominant Polycystic Kidney Disease: Systematic Review and Meta-Analysis
Source: PubMed Central journal article supplement — Nephron Clin Pract. 2024 Feb 1;148(7):457–67. doi: 10.1159/000536245 (PMC11216357; doi:10.1159/000536245), 2024-02-01
Supplement: Supplementary_material-Suppl.1-s1.pdf [file Supplementary_material-Suppl.1-s1.pdf]

| <input type="checkbox"/> | # ▲ | Searches                                                                                                                                                                                                                                                                                                                                                                                                   | Results | Type     | Actions                                                                       | Annotations |
|--------------------------|-----|------------------------------------------------------------------------------------------------------------------------------------------------------------------------------------------------------------------------------------------------------------------------------------------------------------------------------------------------------------------------------------------------------------|---------|----------|-------------------------------------------------------------------------------|-------------|
| <input type="checkbox"/> | 1   | exp Kidney/                                                                                                                                                                                                                                                                                                                                                                                                | 375663  | Advanced | <a href="#">Display Results</a> <a href="#">More</a> <input type="checkbox"/> |             |
| <input type="checkbox"/> | 2   | kidney*.mp. [mp=title, book title, abstract, original title, name of substance word, subject heading word, floating sub-heading word, keyword heading word, organism supplementary concept word, protocol supplementary concept word, rare disease supplementary concept word, unique identifier, synonyms, population supplementary concept word, anatomy supplementary concept word]                     | 910191  | Advanced | <a href="#">Display Results</a> <a href="#">More</a> <input type="checkbox"/> |             |
| <input type="checkbox"/> | 3   | renal*.mp. [mp=title, book title, abstract, original title, name of substance word, subject heading word, floating sub-heading word, keyword heading word, organism supplementary concept word, protocol supplementary concept word, rare disease supplementary concept word, unique identifier, synonyms, population supplementary concept word, anatomy supplementary concept word]                      | 713633  | Advanced | <a href="#">Display Results</a> <a href="#">More</a> <input type="checkbox"/> |             |
| <input type="checkbox"/> | 4   | 1 or 2 or 3                                                                                                                                                                                                                                                                                                                                                                                                | 1142757 | Advanced | <a href="#">Display Results</a> <a href="#">More</a> <input type="checkbox"/> |             |
| <input type="checkbox"/> | 5   | Neoplasms/                                                                                                                                                                                                                                                                                                                                                                                                 | 501400  | Advanced | <a href="#">Display Results</a> <a href="#">More</a> <input type="checkbox"/> |             |
| <input type="checkbox"/> | 6   | neoplas*.mp. [mp=title, book title, abstract, original title, name of substance word, subject heading word, floating sub-heading word, keyword heading word, organism supplementary concept word, protocol supplementary concept word, rare disease supplementary concept word, unique identifier, synonyms, population supplementary concept word, anatomy supplementary concept word]                    | 3326411 | Advanced | <a href="#">Display Results</a> <a href="#">More</a> <input type="checkbox"/> |             |
| <input type="checkbox"/> | 7   | cancer*.mp. [mp=title, book title, abstract, original title, name of substance word, subject heading word, floating sub-heading word, keyword heading word, organism supplementary concept word, protocol supplementary concept word, rare disease supplementary concept word, unique identifier, synonyms, population supplementary concept word, anatomy supplementary concept word]                     | 1945333 | Advanced | <a href="#">Display Results</a> <a href="#">More</a> <input type="checkbox"/> |             |
| <input type="checkbox"/> | 8   | malignan*.mp. [mp=title, book title, abstract, original title, name of substance word, subject heading word, floating sub-heading word, keyword heading word, organism supplementary concept word, protocol supplementary concept word, rare disease supplementary concept word, unique identifier, synonyms, population supplementary concept word, anatomy supplementary concept word]                   | 596399  | Advanced | <a href="#">Display Results</a> <a href="#">More</a> <input type="checkbox"/> |             |
| <input type="checkbox"/> | 9   | tumo?*.mp. [mp=title, book title, abstract, original title, name of substance word, subject heading word, floating sub-heading word, keyword heading word, organism supplementary concept word, protocol supplementary concept word, rare disease supplementary concept word, unique identifier, synonyms, population supplementary concept word, anatomy supplementary concept word]                      | 2245473 | Advanced | <a href="#">Display Results</a> <a href="#">More</a> <input type="checkbox"/> |             |
| <input type="checkbox"/> | 10  | exp Kidney Neoplasms/                                                                                                                                                                                                                                                                                                                                                                                      | 84431   | Advanced | <a href="#">Display Results</a> <a href="#">More</a> <input type="checkbox"/> |             |
| <input type="checkbox"/> | 11  | 5 or 6 or 7 or 8 or 9 or 10                                                                                                                                                                                                                                                                                                                                                                                | 4327866 | Advanced | <a href="#">Display Results</a> <a href="#">More</a> <input type="checkbox"/> |             |
| <input type="checkbox"/> | 12  | polycystic kidney diseases/ or exp polycystic kidney, autosomal dominant/                                                                                                                                                                                                                                                                                                                                  | 10154   | Advanced | <a href="#">Display Results</a> <a href="#">More</a> <input type="checkbox"/> |             |
| <input type="checkbox"/> | 13  | "polycystic kidney disease".mp. [mp=title, book title, abstract, original title, name of substance word, subject heading word, floating sub-heading word, keyword heading word, organism supplementary concept word, protocol supplementary concept word, rare disease supplementary concept word, unique identifier, synonyms, population supplementary concept word, anatomy supplementary concept word] | 12191   | Advanced | <a href="#">Display Results</a> <a href="#">More</a> <input type="checkbox"/> |             |
| <input type="checkbox"/> | 14  | 12 or 13                                                                                                                                                                                                                                                                                                                                                                                                   | 12654   | Advanced | <a href="#">Display Results</a> <a href="#">More</a> <input type="checkbox"/> |             |
| <input type="checkbox"/> | 15  | 4 and 11 and 14                                                                                                                                                                                                                                                                                                                                                                                            | 1875    | Advanced | <a href="#">Display Results</a> <a href="#">More</a> <input type="checkbox"/> |             |
| <input type="checkbox"/> | 16  | Prevalence/                                                                                                                                                                                                                                                                                                                                                                                                | 343766  | Advanced | <a href="#">Display Results</a> <a href="#">More</a> <input type="checkbox"/> |             |
| <input type="checkbox"/> | 17  | prevalen*.mp. [mp=title, book title, abstract, original title, name of substance word, subject heading word, floating sub-heading word, keyword heading word, organism supplementary concept word, protocol supplementary concept word, rare disease supplementary concept word, unique identifier, synonyms, population supplementary concept word, anatomy supplementary concept word]                   | 911082  | Advanced | <a href="#">Display Results</a> <a href="#">More</a> <input type="checkbox"/> |             |
| <input type="checkbox"/> | 18  | inciden*.mp. [mp=title, book title, abstract, original title, name of substance word, subject heading word, floating sub-heading word, keyword heading word, organism supplementary concept word, protocol supplementary concept word, rare disease supplementary concept word, unique identifier, synonyms, population supplementary concept word, anatomy supplementary concept word]                    | 1035878 | Advanced | <a href="#">Display Results</a> <a href="#">More</a> <input type="checkbox"/> |             |
| <input type="checkbox"/> | 19  | common*.mp. [mp=title, book title, abstract, original title, name of substance word, subject heading word, floating sub-heading word, keyword heading word, organism supplementary concept word, protocol supplementary concept word, rare disease supplementary concept word, unique identifier, synonyms, population supplementary concept word, anatomy supplementary concept word]                     | 1954552 | Advanced | <a href="#">Display Results</a> <a href="#">More</a> <input type="checkbox"/> |             |
| <input type="checkbox"/> | 20  | occur*.mp. [mp=title, book title, abstract, original title, name of substance word, subject heading word, floating sub-heading word, keyword heading word, organism supplementary concept word, protocol supplementary concept word, rare disease supplementary concept word, unique identifier, synonyms, population supplementary concept word, anatomy supplementary concept word]                      | 2133779 | Advanced | <a href="#">Display Results</a> <a href="#">More</a> <input type="checkbox"/> |             |
| <input type="checkbox"/> | 21  | 16 or 17 or 18 or 19 or 20                                                                                                                                                                                                                                                                                                                                                                                 | 5111469 | Advanced | <a href="#">Display Results</a> <a href="#">More</a> <input type="checkbox"/> |             |
| <input type="checkbox"/> | 22  | 15 and 21                                                                                                                                                                                                                                                                                                                                                                                                  | 477     | Advanced | <a href="#">Display Results</a> <a href="#">More</a> <input type="checkbox"/> |             |

[Save](#)[Remove](#)

Combine with:

 AND OR[Contract](#)[Save All](#)[Edit](#)[Create RSS](#)[Create Auto-Alert](#)[View Saved](#)[Share Search History](#)
